# Supplementary material
Source: Research Square preprint supplement (doi:10.21203/rs.3.rs-9919090/v1)
Supplement: Supplementary file 1 [file a166e369447b4e88af49ddb1.pdf]

Supplementary Files for

**Repeated cooling and productivity pulses restructured surface ocean ecosystems during the Mid-Cenomanian Event**

Tangunan et al.

**FIGURES**

**Supplementary Figure 1:** Occurrences of calcareous nannofossil species from the Lydden Spout section, Folkestone, southeast England, UK.

**Supplementary Figure 2:** Variability and species-specific responses across the Mid-Cenomanian Event (MCE) at the Lydden Spout section, Folkestone, southeast England, UK.

**TABLE**

**Supplementary Table 1:** Key ecological traits of calcareous nannofossil taxa

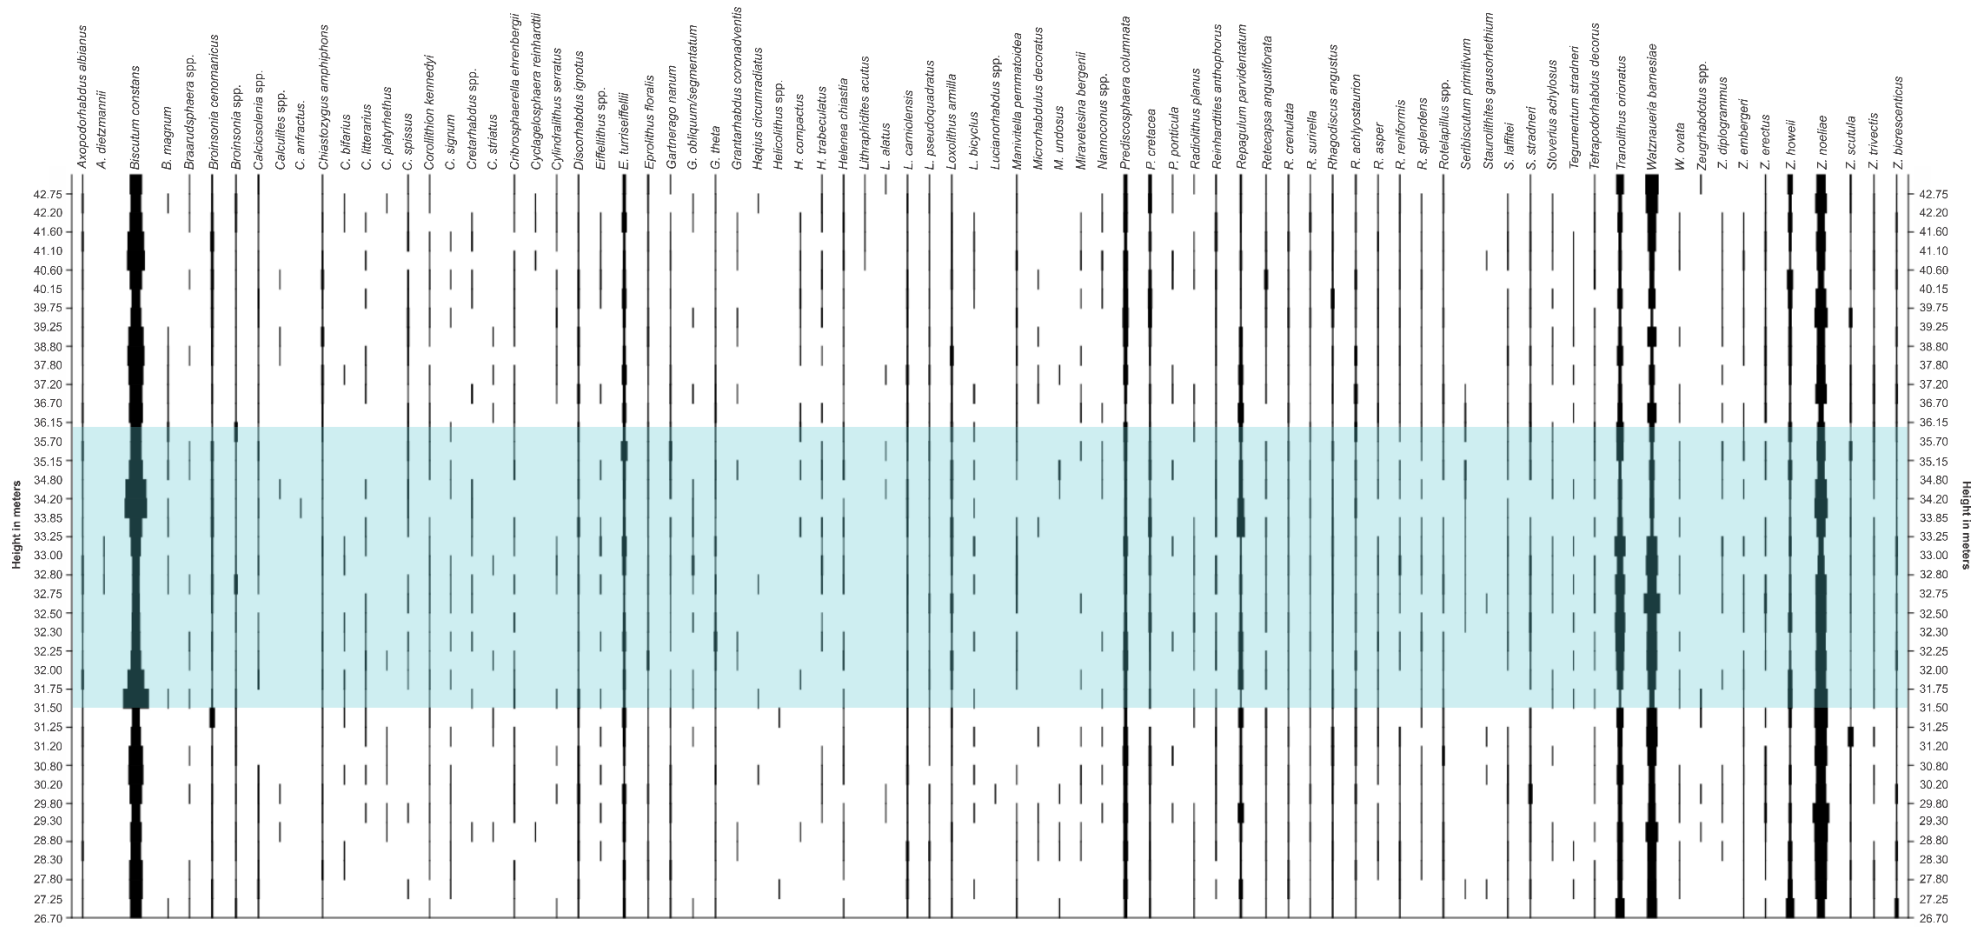

**Supplementary Figure 1:** Occurrences of calcareous nannofossil species from the Lydden Spout section at Folkestone, southeast England, UK: spindles represent the relative abundances from quantitative counts, with presence-only data obtained from scanning additional fields of view. Blue band indicates the Middle Cenomanian Event interval.

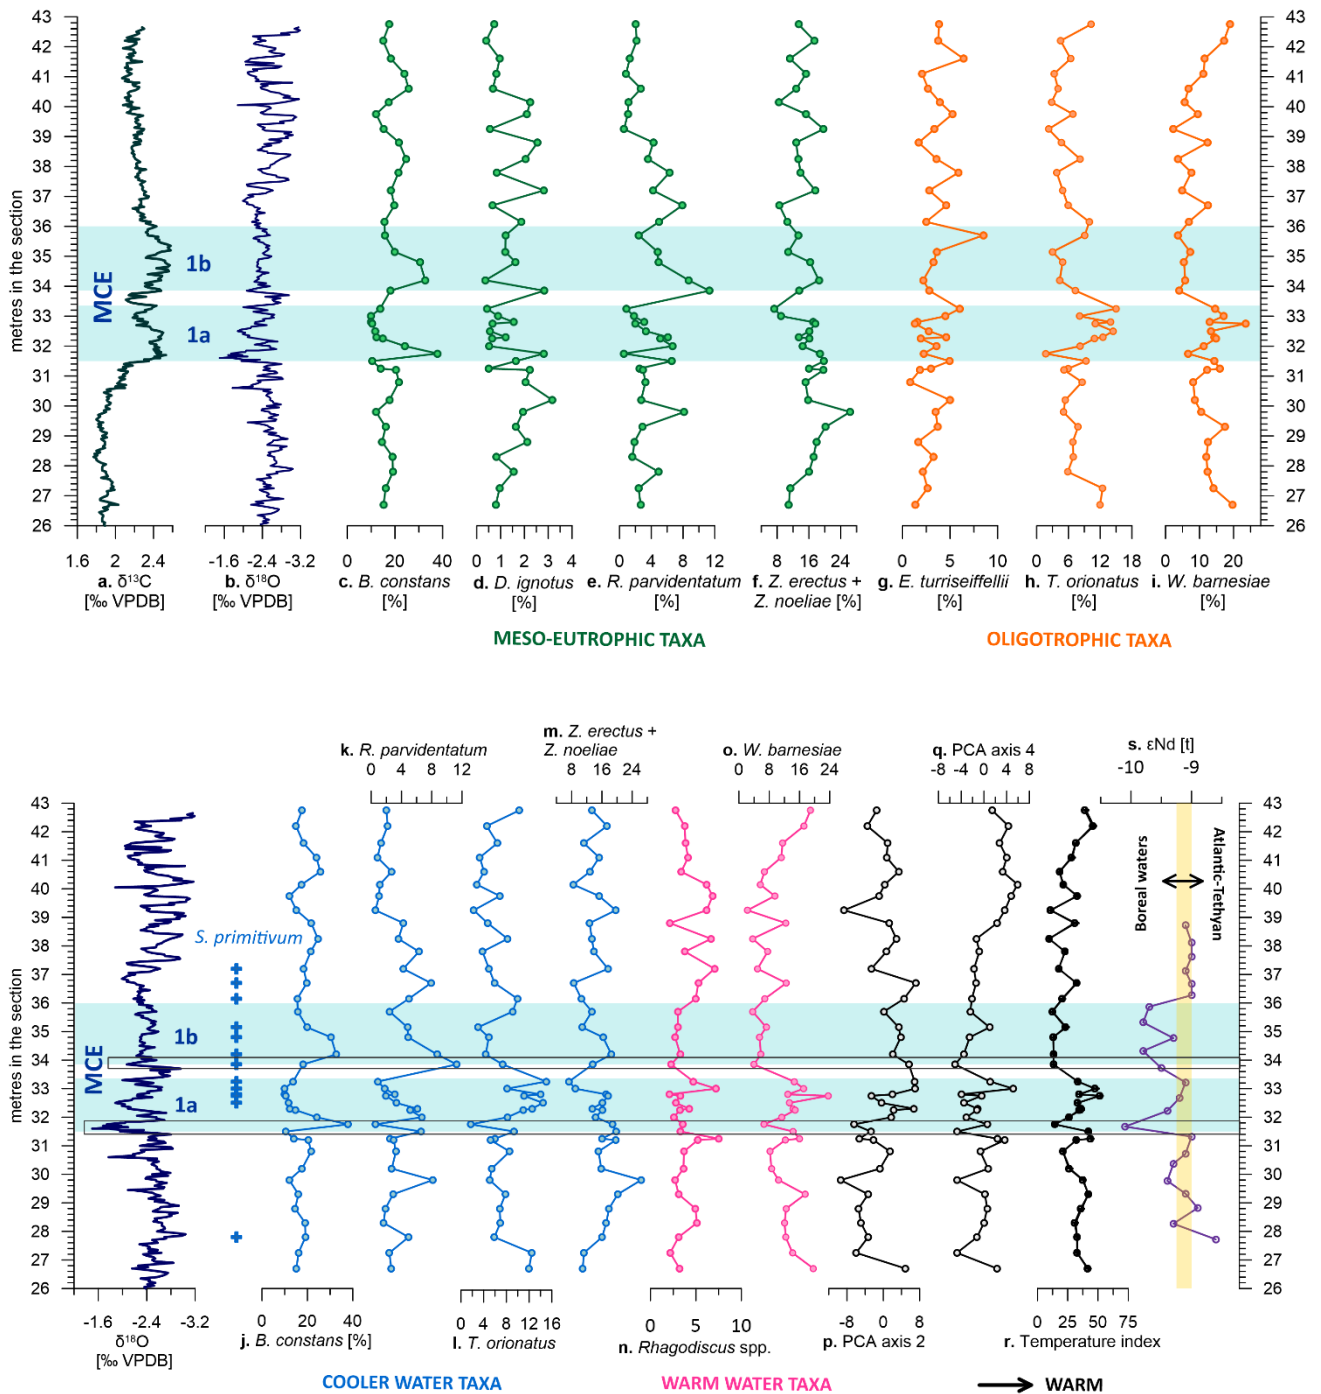

**Supplementary Fig. 2:** Variability and species-specific responses across the Mid-Cenomanian Event (MCE) at the Lydden Spout section, Folkestone, southeast England, UK: **a)** bulk carbonate  $\delta^{13}\text{C}$  and **b)**  $\delta^{18}\text{O}$  records<sup>1</sup>; **c) to f)** relative abundances of meso-eutrophic taxa (*Biscutum constans*, *Discorhabdus ignotus*, *Repagulum parvidentatum*, and *Zeughrabdotos erectus* + *Z. noeliae*); **g) to i)** relative abundances of oligotrophic taxa (*Eiffellithus turriseiffelii*, *Tranolithus orionatus*, and *Watznaueria barnesiae*); **j) to n)** relative abundances of temperature-sensitive taxa, including cooler-water taxa (*Biscutum constans*, *Repagulum parvidentatum*, *Tranolithus orionatus*) and warm-water taxa (*Rhagodiscus* spp. and *Watznaueria barnesiae*), together with PCA axes (**p**, **q**) and temperature index (**r**). Also shown is the neodymium isotope ( $\epsilon\text{Nd}$ ) record of the studied section<sup>2</sup>, suggesting episodic influence of Boreal seawater in the epicontinental seas during MCE. Horizontal bars indicate horizons yielding Boreal-affiliated macrofauna. The blue shaded band marks the MCE, with sub-events MCE 1a and 1b indicated.

**Supplementary Table 1:** Key ecological traits of calcareous nannofossil taxa (1= This study; 2 = Bottini and Erba<sup>3</sup>; 3 = Hardas, et al.<sup>4</sup>; 4 = Linnert, et al.<sup>5</sup>).

| SPECIES                                   | Cold    | Warm | Eutrophic (Mixed) | Mesotrophic | Oligotrophic (Stratified) |
|-------------------------------------------|---------|------|-------------------|-------------|---------------------------|
| <i>Biscutum constans</i>                  | 1, 2, 4 |      | 1, 2, 3           | 3           |                           |
| <i>Biscutum ellipticum</i>                | 4       |      |                   |             |                           |
| <i>Broinsonia</i> spp.                    |         |      |                   |             | 3                         |
| <i>Discorhabdus ignotus</i>               |         |      | 1, 2              |             |                           |
| <i>Eiffellithus turriseffellii</i>        |         |      |                   |             | 3                         |
| <i>Eprolithus floralis</i>                | 2       |      |                   |             | 3                         |
| <i>Gartnerago segmentatum</i>             |         |      |                   |             | 3                         |
| <i>Helicolithus</i> spp.                  |         |      | 3                 | 3           |                           |
| <i>Prediscosphaera cretacea/columnata</i> |         |      |                   |             | 3                         |
| <i>Prediscosphaera spinosa</i>            |         |      |                   |             | 3                         |
| <i>Repagulum parvidentatum</i>            | 1, 2    |      |                   |             |                           |
| <i>Rhagodiscus asper</i>                  |         | 2    | 3                 | 3           |                           |
| <i>Rhagodiscus</i> spp.                   |         | 1, 2 |                   |             |                           |
| <i>Seribiscutum gaultensis</i>            |         |      |                   |             | 3                         |
| <i>Staurolithites crux</i>                |         |      | 3                 | 3           |                           |
| <i>Staurolithites stradneri</i>           | 2       |      |                   |             |                           |
| <i>Tranolithus orionatus</i>              | 1, 2    |      |                   |             | 3                         |
| <i>Watznaueria barnesiae</i>              |         | 1, 2 |                   |             | 1, 2, 3, 4                |
| <i>Zeugrhabdotus diplogrammus</i>         |         | 2    |                   |             |                           |
| <i>Zeugrhabdotus erectus</i>              | 1       |      | 1, 2              | 1, 3        |                           |
| <i>Zeugrhabdotus noeliae</i>              | 1       |      | 1                 | 1           |                           |
| <i>Zeugrhabdotus</i> spp.                 |         |      | 2                 | 4           |                           |

## References

- Petrizzo, M. R. & Gale, A. S. Planktonic foraminifera document palaeoceanographic changes across the middle Cenomanian carbon-isotope excursion MCE 1: new evidence from the UK chalk. *Geological Magazine* **160**, 372-392 (2023).
- Zheng, X.-Y., Jenkyns, H. C., Gale, A. S., Ward, D. J. & Henderson, G. M. A climatic control on reorganization of ocean circulation during the mid-Cenomanian event and Cenomanian-Turonian oceanic anoxic event (OAE 2): Nd isotope evidence. *Geology* **44**, 151-154 (2016).
- Bottini, C. & Erba, E. Mid-Cretaceous paleoenvironmental changes in the western Tethys. *Climate of the Past* **14**, 1147-1163 (2018).
- Hardas, P., Mutterlose, J., Friedrich, O. & Erbacher, J. The Middle Cenomanian Event in the equatorial Atlantic: the calcareous nannofossil and benthic foraminiferal response. *Marine Micropaleontology* **96**, 66-74 (2012).
- Linnert, C., Mutterlose, J. & Mortimore, R. Calcareous nannofossils from Eastbourne (southeastern England) and the paleoceanography of the Cenomanian–Turonian boundary interval. *Palaios* **26**, 298-313 (2011).
